# Supplementary material for: Encapsulation of Hemp (Cannabis sativa L.) Essential Oils into Nanoemulsions for Potential Therapeutic Applications: Assessment of Cytotoxicological Profiles
Source: MDPI journal article supplement (doi:10.3390/molecules28186479), 2023-09-07
Supplement: s1 [file s1]

Supplementary materials

## Encapsulation of hemp (*Cannabis sativa* L.) essential oils into nanoemulsions for potential therapeutic applications: assessment of cytotoxicological profile

Cristina Aguzzi<sup>1‡</sup>, Diego Romano Perinelli<sup>2‡</sup>, Marco Cespi<sup>2</sup>, Laura Zeppa<sup>1</sup>, Eugenia Mazzara<sup>2</sup>, Filippo Maggi<sup>2</sup>, Riccardo Petrelli<sup>2</sup>, Giulia Bonacucina<sup>2\*</sup>, Massimo Nabissi<sup>1\*</sup>

<sup>1</sup> Department of Experimental Medicine, School of Pharmacy, University of Camerino, Via Madonna delle Carceri 9, 62032, Camerino, Italy

<sup>2</sup> Chemistry Interdisciplinary Project (ChIP) Research Center, School of Pharmacy, University of Camerino, Via Madonna delle Carceri, 62032, Camerino, Italy

\* Correspondence: [giulia.bonacucina@unicam.it](mailto:giulia.bonacucina@unicam.it); [massimo.nabissi@unicam.it](mailto:massimo.nabissi@unicam.it)

‡ These authors equally contributed

**Table S1.** Complete GC-MS characterization of Uso 31 and Carmagnola CS EOs.

23

| N                              | Component <sup>a</sup>      | RI Calc. <sup>b</sup> | RI lit. <sup>c</sup> | % Uso 31 | % Carmagnola CS |
|--------------------------------|-----------------------------|-----------------------|----------------------|----------|-----------------|
| 1                              | $\alpha$ -Thujene           | 921                   | 924                  | 0.02     | 0.02            |
| 2                              | $\alpha$ -Pinene            | 926                   | 932                  | 11.07    | 13.45           |
| 3                              | Camphene                    | 939                   | 946                  | 0.04     | 0.17            |
| 4                              | Sabinene                    | 966                   | 967                  | 0.04     |                 |
| 5                              | $\beta$ -Pinene             | 968                   | 974                  | 3.59     | 5.45            |
| 6                              | Myrcene                     | 989                   | 988                  | 15.28    | 37.57           |
| 7                              | $\alpha$ -Phellandrene      | 1003                  | 1002                 | 0.13     | 0.08            |
| 8                              | $\delta$ -3-Carene          | 1008                  | 1008                 | 0.06     | 0.09            |
| 9                              | $\alpha$ -Terpinene         | 1014                  | 1014                 | 0.02     | 0.07            |
| 10                             | Limonene                    | 1025                  | 1024                 | 1.59     | 5.37            |
| 11                             | (1,8)-Cineole               | 1027                  | 1026                 |          | 0.43            |
| 12                             | (Z)- $\beta$ -Ocimene       | 1037                  | 1032                 | 0.21     | 0.16            |
| 13                             | (E)- $\beta$ -Ocimene       | 1047                  | 1044                 | 6.71     | 1.79            |
| 14                             | $\gamma$ -Terpinene         | 1056                  | 1054                 | 0.02     | 0.08            |
| 15                             | Terpinolene                 | 1085                  | 1086                 | 5.46     | 2.97            |
| 16                             | (Z)-Caryophyllene           | 1407                  | 1408                 |          | 0.23            |
| 17                             | (E)-Caryophyllene           | 1409                  | 1417                 | 25.93    | 16.99           |
| 18                             | $\alpha$ -trans-Bergamotene | 1430                  | 1432                 | 2.13     | 0.19            |
| 19                             | $\alpha$ -Humulene          | 1443                  | 1452                 | 8.92     | 6.11            |
| 20                             | allo-Aromadendrene          | 1450                  | 1458                 | 1.32     | 0.18            |
| 21                             | (E)- $\beta$ -Farnesene     | 1456                  | 1454                 | 1.70     | 0.06            |
| 22                             | $\beta$ -Selinene           | 1476                  | 1489                 | 3.35     | 1.16            |
| 23                             | $\alpha$ -Selinene          | 1485                  | 1498                 | 1.96     | 0.89            |
| 24                             | $\alpha$ -Bulnesene         | 1507                  | 1509                 |          | 0.22            |
| 25                             | $\delta$ -Cadinene          | 1519                  | 1522                 |          | 0.04            |
| 26                             | Selina-3,7(11)-diene        | 1531                  | 1545                 |          | 0.11            |
| 27                             | Caryophyllene oxide         | 1571                  | 1582                 | 7.23     | 2.95            |
| 28                             | Humulene epoxide II         | 1593                  | 1608                 | 1.81     | 0.63            |
| 29                             | Cannabidiol                 | 2419                  | 2430                 | 0.43     | 0.23            |
| <b>Total identified (%)</b>    |                             |                       |                      | 99.03    | 97.72           |
| Monoterpene hydrocarbons (%)   |                             |                       |                      | 44.24    | 67.27           |
| Oxygenated monoterpenes (%)    |                             |                       |                      |          | 0.43            |
| Sesquiterpene hydrocarbons (%) |                             |                       |                      | 45.31    | 26.18           |
| Oxygenated sesquiterpenes (%)  |                             |                       |                      | 9.04     | 3.58            |
| Cannabinoids (%)               |                             |                       |                      | 0.43     | 0.23            |

24

**Disclaimer/Publisher's Note:** The statements, opinions and data contained in all publications are solely those of the individual author(s) and contributor(s) and not of MDPI and/or the editor(s). MDPI and/or the editor(s) disclaim responsibility for any injury to people or property resulting from any ideas, methods, instructions or products referred to in the content.

25

26

27
